# Supplementary material
Source: MDPI journal article supplement (https://www.mdpi.com/2072-4292/12/12/2065)
Supplement: s1 [file s1]

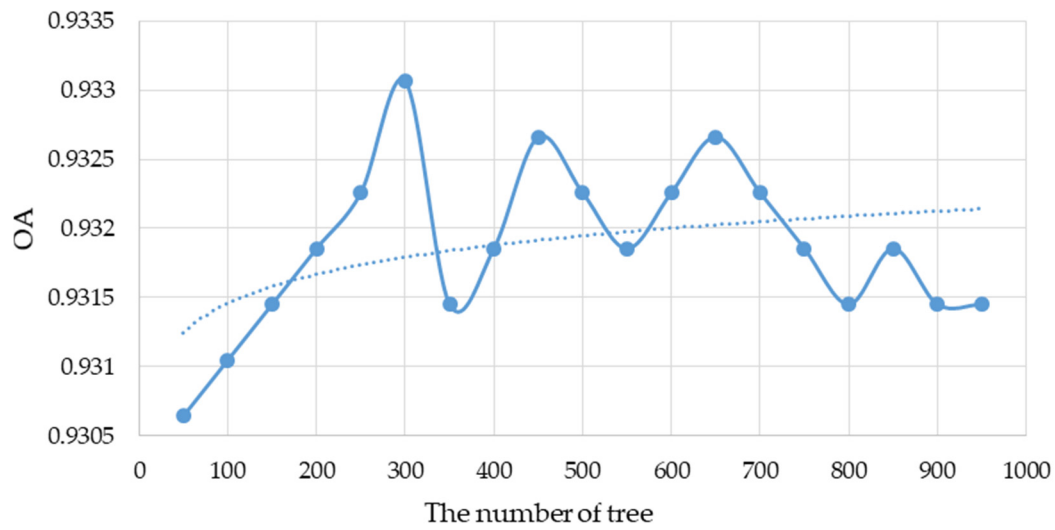

**Figure S1.** The impact of selection of number of trees in Radom Forest (RF) on classification results. RF models were built with the number of trees ranging from 50 to 950. OA represents Overall Accuracy.
